# Supplementary material
Source: publisher figshare collection journal article supplement (https://acs.figshare.com/ndownloader/files/17487863)
Supplement: Supplementary file 1 [file 17487863]

## Supporting Information

### **Surface Assistant Charge Separation in PEC Cu<sub>2</sub>S-Ni/Cu<sub>2</sub>O Cathode**

Wan Zhang<sup>1</sup>, Ruotian Chen<sup>2</sup>, Zhiguang Yin<sup>1</sup>, Xinyu Wang<sup>1</sup>, Zenglin Wang<sup>1</sup>, Fengtao Fan<sup>2</sup>, Yi Ma<sup>1\*</sup>

<sup>1</sup> Key Laboratory of Applied Surface and Colloid Chemistry, Ministry of Education, School of Chemistry and Chemical Engineering, Shaanxi Normal University, Xi'an 710119, Shaanxi, China

<sup>2</sup> State Key Laboratory of Catalysis, Dalian National Laboratory for Clean Energy, The Collaborative Innovation Centre of Chemistry for Energy Materials (iChEM), Dalian Institute of Chemical Physics, Chinese Academy of Sciences, Zhongshan Road 457, Dalian 116023, China

\*Corresponding author: [mayi@snnu.edu.cn](mailto:mayi@snnu.edu.cn)

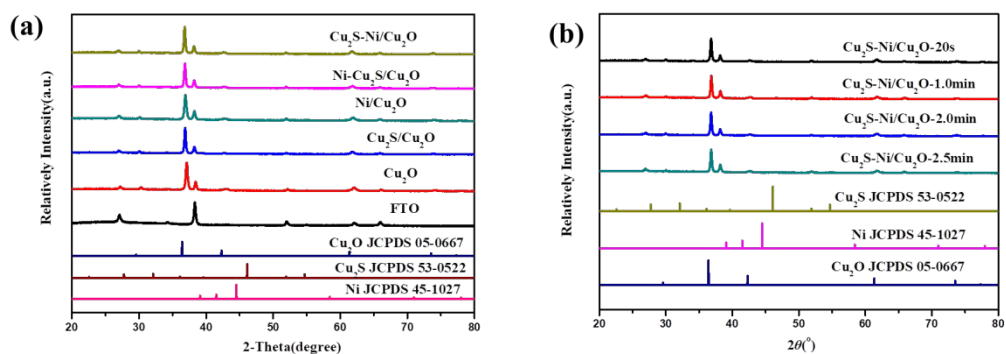

**Fig. S1** - XRD patterns of (a)  $\text{Cu}_2\text{O}$ ,  $\text{Cu}_2\text{S/Cu}_2\text{O}$ ,  $\text{Ni/Cu}_2\text{O}$ ,  $\text{Ni-Cu}_2\text{S/Cu}_2\text{O}$  and  $\text{Cu}_2\text{S-Ni/Cu}_2\text{O}$  and (b)  $\text{Cu}_2\text{S-Ni/Cu}_2\text{O}$  photoelectrodes with various Ni content.

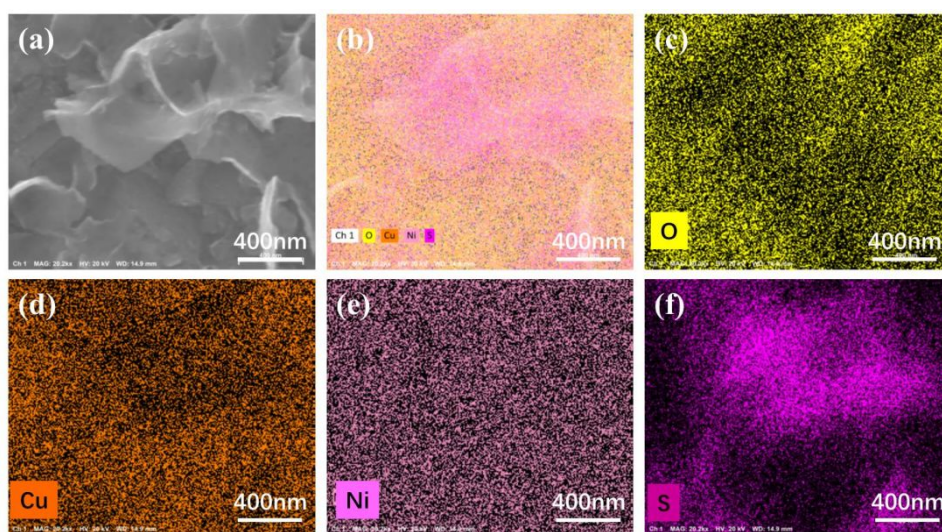

**Fig. S2** Enlarged top-view SEM image of Cu<sub>2</sub>S-Ni/Cu<sub>2</sub>O (a) and corresponding EDX mapping for all elements (b), O (c), Cu (d), Ni (e) and S (f).

|     |         |         |              |                |               |                             |
|-----|---------|---------|--------------|----------------|---------------|-----------------------------|
| (a) | Element | At. No. | Mass [%]     | Mass Norm. [%] | Atom [%]      | abs. error [%]<br>(1 sigma) |
|     | Oxygen  | 8       | 7.32         | 8.52           | 27.01         | 0.89                        |
|     | Copper  | 29      | 78.54        | 91.48          | 72.99         | 2.12                        |
|     |         |         | <b>85.85</b> | <b>100.00</b>  | <b>100.00</b> |                             |
|     |         |         |              |                |               |                             |
| (b) | Element | At. No. | Mass [%]     | Mass Norm. [%] | Atom [%]      | abs. error [%]<br>(1 sigma) |
|     | Oxygen  | 8       | 6.27         | 6.85           | 22.12         | 1.01                        |
|     | Sulfur  | 16      | 2.42         | 2.64           | 4.26          | 0.12                        |
|     | Copper  | 29      | 82.92        | 90.51          | 73.62         | 2.27                        |
|     |         |         | <b>91.62</b> | <b>100.00</b>  | <b>100.00</b> |                             |
| (c) | Element | At. No. | Mass [%]     | Mass Norm. [%] | Atom [%]      | abs. error [%]<br>(1 sigma) |
|     | Oxygen  | 8       | 7.53         | 7.97           | 25.58         | 1.17                        |
|     | Copper  | 29      | 86.44        | 91.51          | 73.96         | 2.37                        |
|     | Nickel  | 28      | 0.49         | 0.52           | 0.46          | 0.05                        |
|     |         |         | <b>94.46</b> | <b>100.00</b>  | <b>100.00</b> |                             |
| (d) | Element | At. No. | Mass [%]     | Mass Norm. [%] | Atom [%]      | abs. error [%]<br>(1 sigma) |
|     | Sulfur  | 16      | 1.47         | 1.66           | 2.43          | 0.09                        |
|     | Nickel  | 28      | 0.46         | 0.53           | 0.42          | 0.05                        |
|     | Oxygen  | 8       | 10.15        | 11.50          | 33.63         | 1.48                        |
|     | Copper  | 29      | 76.17        | 86.31          | 63.53         | 2.09                        |
| (e) | Element | At. No. | Mass [%]     | Mass Norm. [%] | Atom [%]      | abs. error [%]<br>(1 sigma) |
|     | Oxygen  | 8       | 3.04         | 3.49           | 11.52         | 0.60                        |
|     | Sulfur  | 16      | 8.83         | 10.15          | 16.71         | 0.35                        |
|     | Copper  | 29      | 75.01        | 86.23          | 71.65         | 2.06                        |
|     | Nickel  | 28      | 0.12         | 0.14           | 0.13          | 0.04                        |
|     |         |         | <b>87.00</b> | <b>100.00</b>  | <b>100.00</b> |                             |

**Fig. S3** Elements distributions of photoelectrodes analyzed by EDX spectra: (a)  $\text{Cu}_2\text{O}$ , (b)  $\text{Cu}_2\text{S}/\text{Cu}_2\text{O}$ , (c)  $\text{Ni}/\text{Cu}_2\text{O}$ , (d)  $\text{Ni-Cu}_2\text{S}/\text{Cu}_2\text{O}$ , (e)  $\text{Cu}_2\text{S-Ni}/\text{Cu}_2\text{O}$ .

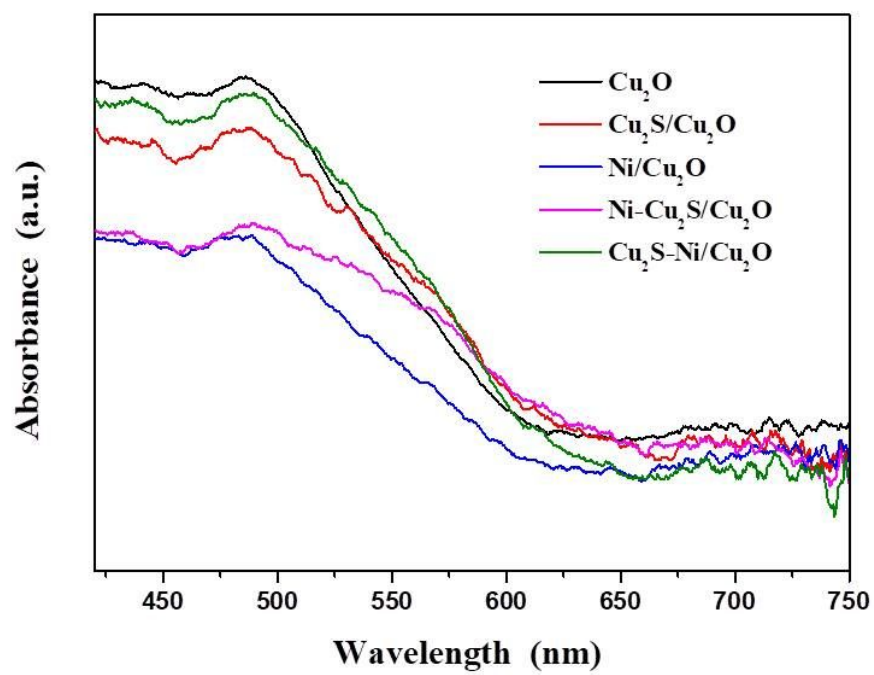

**Figure S4.** UV-Vis diffuse reflectance spectra of the photoelectrodes.

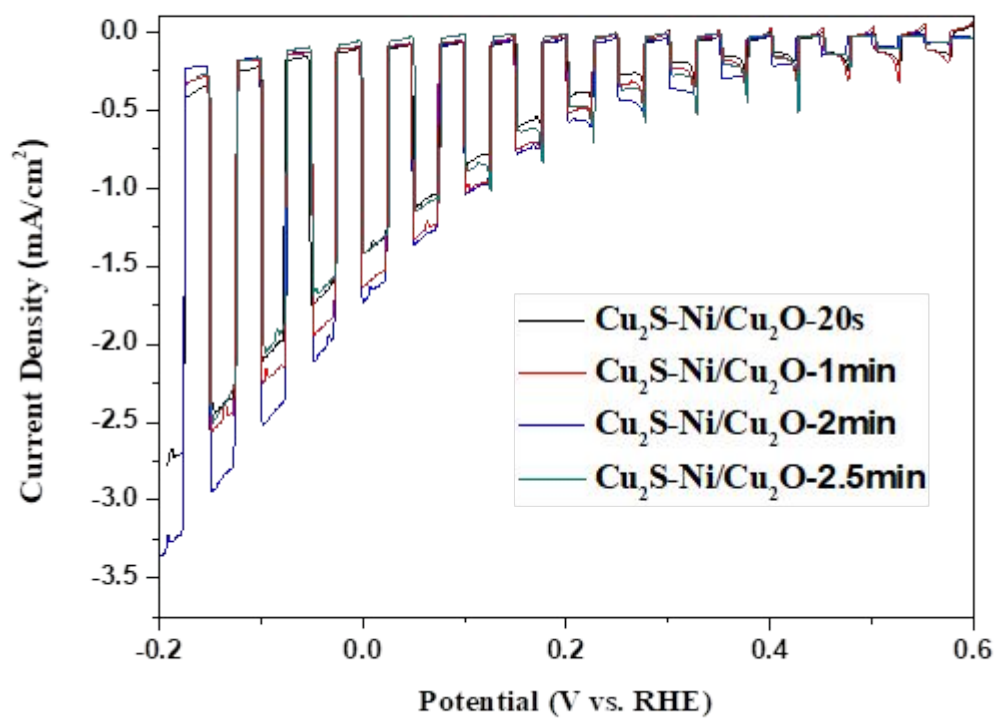

**Fig. S5** The I-V curves of  $\text{Cu}_2\text{S-Ni/Cu}_2\text{O}$  photoelectrodes with different content of Ni under chopped light irradiation of a Xe-lamp with AM 1.5 G filter.

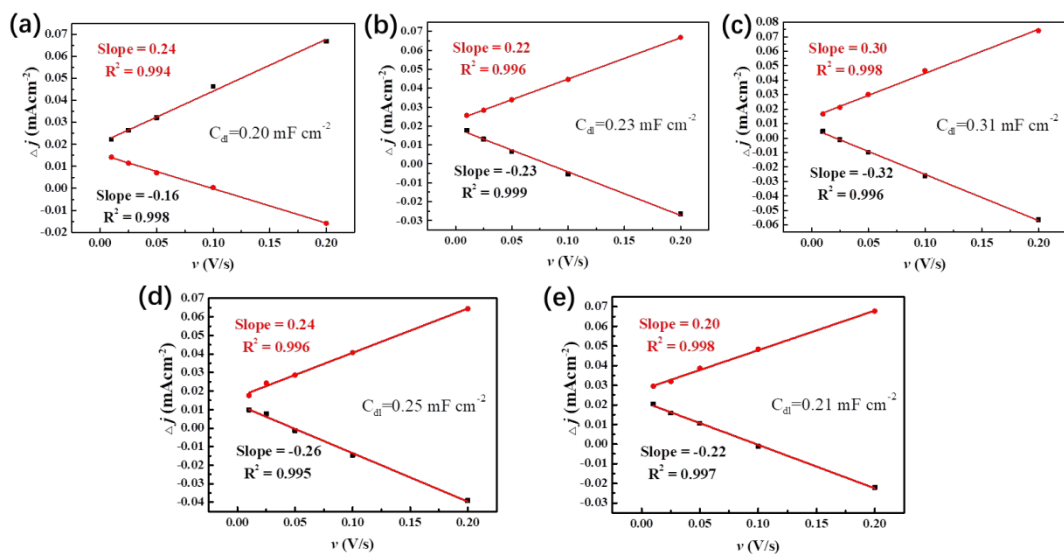

**Fig. S6** Charging current density differences plotted against scan rate: (a)  $\text{Cu}_2\text{O}$ , (b)  $\text{Cu}_2\text{S/Cu}_2\text{O}$ , (c)  $\text{Ni/Cu}_2\text{O}$ , (d)  $\text{Ni-Cu}_2\text{S/Cu}_2\text{O}$  and (e)  $\text{Cu}_2\text{S-Ni/Cu}_2\text{O}$ . The linear slope is equivalent to the double-layer capacitance  $C_{dl}$ , representing the electrochemical surface area.
